# Supplementary material for: Laccase production by Coriolopsis caperata RCK2011: Optimization under solid state fermentation by Taguchi DOE methodology
Source: PubMed Central journal article supplement — Sci Rep. 2013 Mar 6;3:1386. doi: 10.1038/srep01386 (PMC3589721; doi:10.1038/srep01386), 2013-03-06
Supplement: srep01386-s1.pdf [file srep01386-s1.pdf]

**Laccase production by *Coriolopsis caperata* RCK2011: Optimization under solid state fermentation by Taguchi DOE methodology**

Preeti Nandal<sup>1</sup>, Sreenivas Rao Ravella<sup>2</sup> & Ramesh Chander Kuhad<sup>1\*</sup>

<sup>1</sup>Lignocellulose Biotechnology Laboratory, Department of Microbiology, University of Delhi South Campus, Benito Juarez Road, New Delhi-110021, India

<sup>2</sup>Institute of Biological Environmental and Rural Sciences (IBERS), Aberystwyth University, Gogerddan, Aberystwyth, Ceredigion, SY23 3EE, UK

**\* Corresponding Author:** Prof. R. C. Kuhad

Lignocellulose Biotechnology Laboratory,

Department of Microbiology,

University of Delhi South Campus,

New Delhi – 110021, India.

(E-mail: [kuhad85@gmail.com](mailto:kuhad85@gmail.com))

Phone: +91-9871509870 (Mobile)

Fax: +91-11-24115270

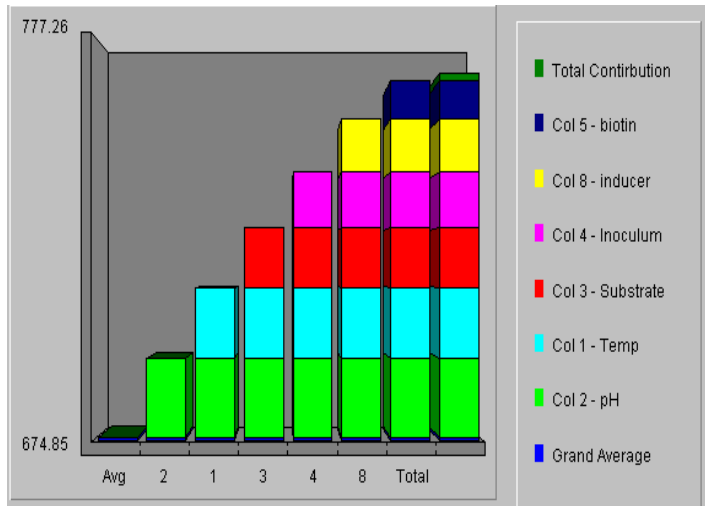

**Supplementary Figure S1 | Optimum performance with the major factors contribution**

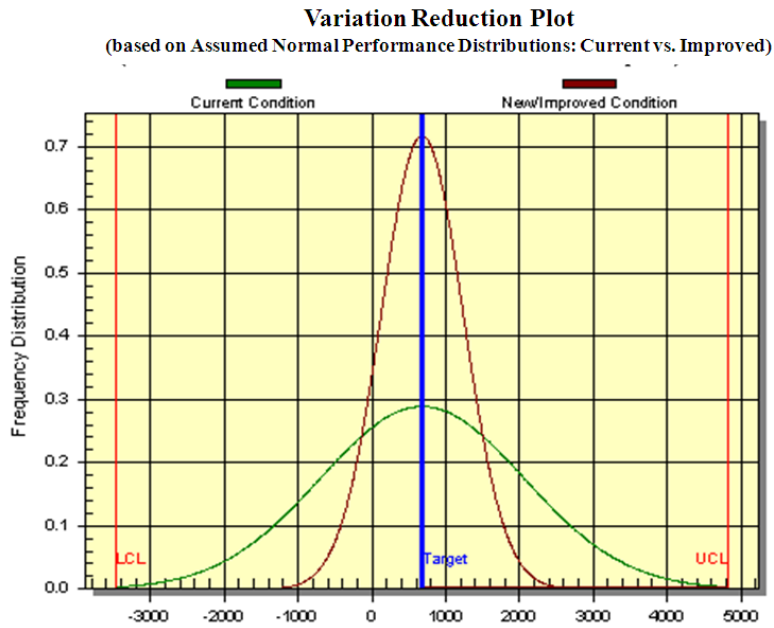

**Supplementary Figure S2 | Performance distribution on laccase production by *Coriolopsis caperata* RCK2011 at current and improved conditions under solid state fermentation**

**Supplementary Figure legends:**

Supplementary Figure S1. Optimum performance with the major factors contribution

Supplementary Figure S2. Performance distribution on laccase production by *Coriolopsis*  
*caperata* RCK2011 at current and improved conditions under solid state fermentation
